# Supplementary material
Source: Research Square preprint supplement (doi:10.21203/rs.3.rs-9738423/v1)

Supplementary Figure Time-dependent probability of on-scene ROSC with favorable neurological outcomes under various conditions.


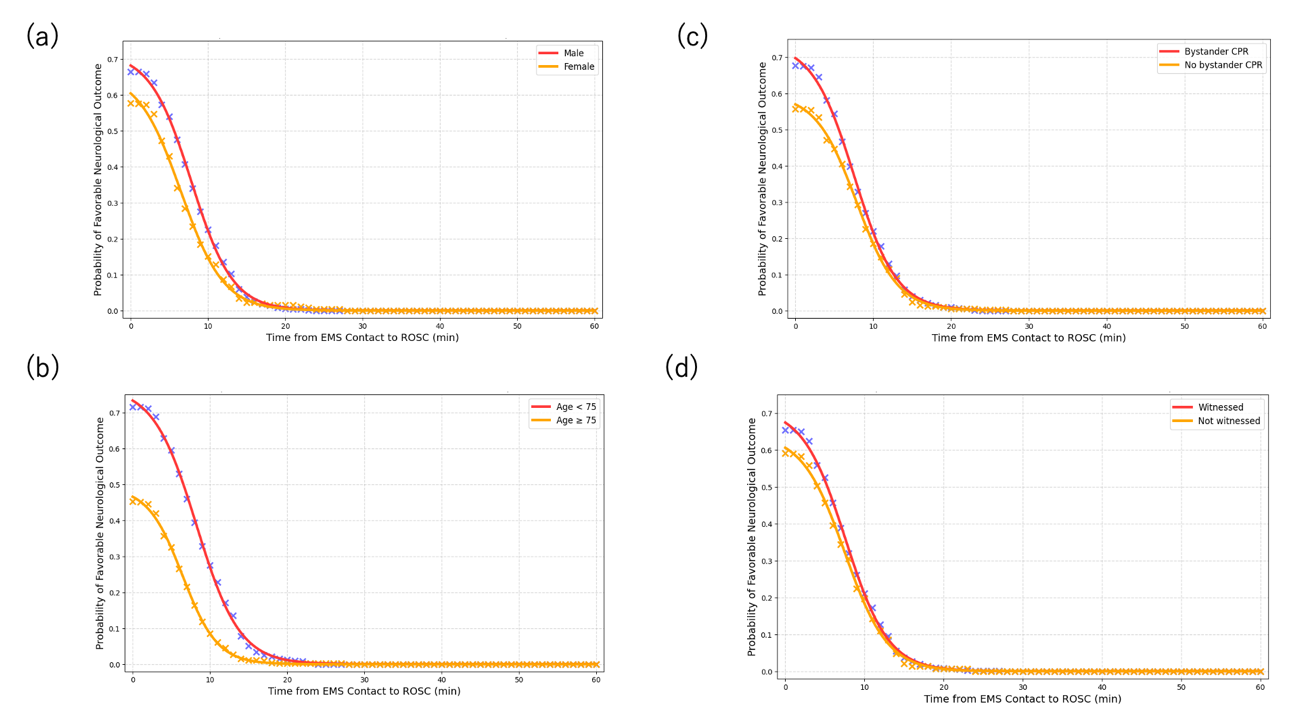

Supplement: Supplementary file 1 [file 0ed563d690611fe34ed4c87c.docx]
